# Supplementary material for: Methyl bromide production from dissolved organic matter under simulated sunlight irradiation and the important effect of ferric ions
Source: Royal Society of Chemistry journal article supplement (doi:10.1039/c9em00473d), 2020-01-01
Supplement: c9em00473d1.pdf [file c9em00473d1.pdf]

## Supplementary Material

### **Methyl bromide production from dissolved organic matter under simulated sunlight irradiation, and the important effect of ferric ions**

Hui Liu,<sup>\*a</sup> Tong Tong <sup>a</sup>, Yingying Pu <sup>a</sup>, Xiaomei Zhu <sup>a</sup>, Bing Sun <sup>a</sup>, Zhaowei Wang<sup>a</sup>, Zhiyu Yan <sup>a</sup>

<sup>a</sup>College of Environmental Science and Engineering, Dalian Maritime University, Dalian 116026.

\*Corresponding author: Hui Liu, [liuhui@dlmu.edu.cn](mailto:liuhui@dlmu.edu.cn)

**Text S1.** The FTIR spectra of HA showed the typical bands for this type of material. Major bands were described as follows: -OH stretching vibration absorption at 3500-2500 cm<sup>-1</sup>, C-H stretching vibration absorption of aliphatic series at 3000-2800 cm<sup>-1</sup>, the band of asymmetric carboxyl groups near 1567 cm<sup>-1</sup> and the symmetric COO<sup>-</sup> band around 1370 cm<sup>-1</sup>, C-O stretching vibration in alcohols, ethers and/or polysaccharides around 1050-1165 cm<sup>-1</sup>, skeleton vibration and stretching vibration of -C-C- at 900-1000 cm<sup>-1</sup>.<sup>1,2</sup>

**Text S2.** The addition of Fe(III) caused an obvious fluorescence quenching of the HA, indicating that Fe(III)-HA complexing reactions occurred, and the binding ability of HA and Fe(III) can be quantitatively described by the following equations:

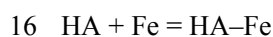

$$K_c = [\text{HA-Fe}] / ([\text{HA}][\text{Fe}])$$

where [Fe] and [HA] are the concentrations of Fe(III) and organic ligands in HA, respectively, and

$K_C$  is the conditional stability constant for complex formation between Fe(III) and HA.

The  $K_C$  value can be estimated using the modified Stern-Volmer equation (1).

$$I_0 / (I_0 - I) = 1 / (f K_c [\text{Fe}]) + 1 / f$$

where  $I$  and  $I_0$  are the fluorescence intensities of the samples with and without the addition of Fe(III), respectively, and  $f$  is the fraction of the initial fluorescence that corresponds to the binding fluorophores. The  $K_C$  value can be obtained from the slopes ( $1/f K_C$ ) and intercepts ( $1/f$ ) of the linear plots of  $I_0 / (I_0 - I)$  versus  $1/[\text{Fe}]$ .

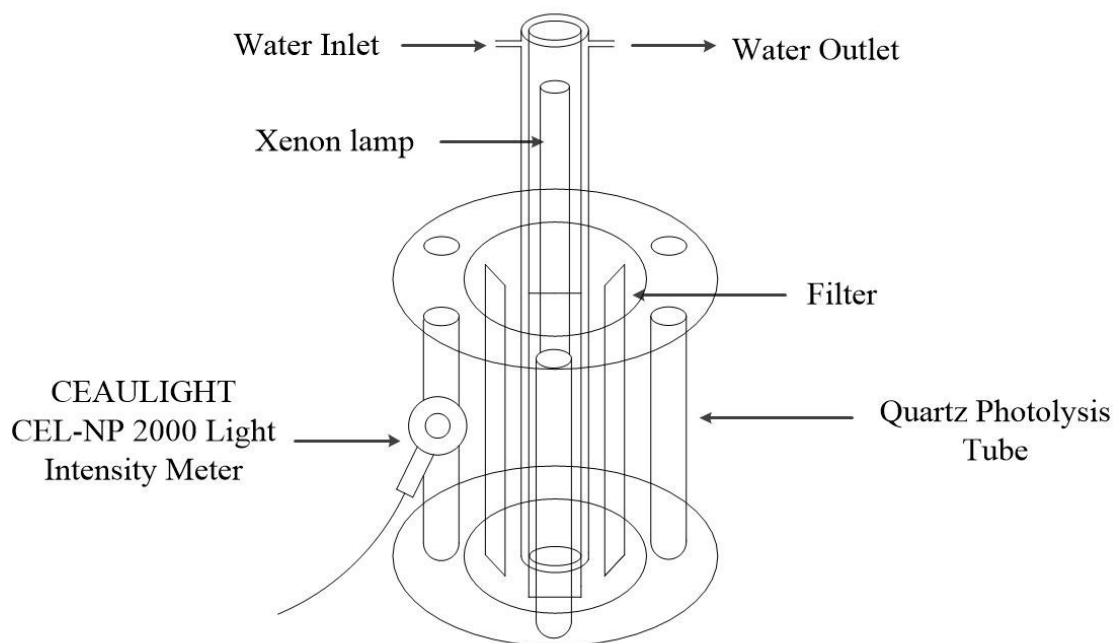

**Fig. S1** Schematic of the device used for irradiation.

It is a so-called merry-go-round photoreactor. Xenon lamp was placed in a quartz jacket where cold water (10 °C ) was driven by a cooling circulating pump to take away the heat of the infrared radiation. Eight pieces of filters were placed around the jacket to cut off the light with the wavelength below 290 nm. A light intensity meter (CEAULIGHT CEL-NP 2000) was used to measure the light intensity at the position where to place the quartz tubes.

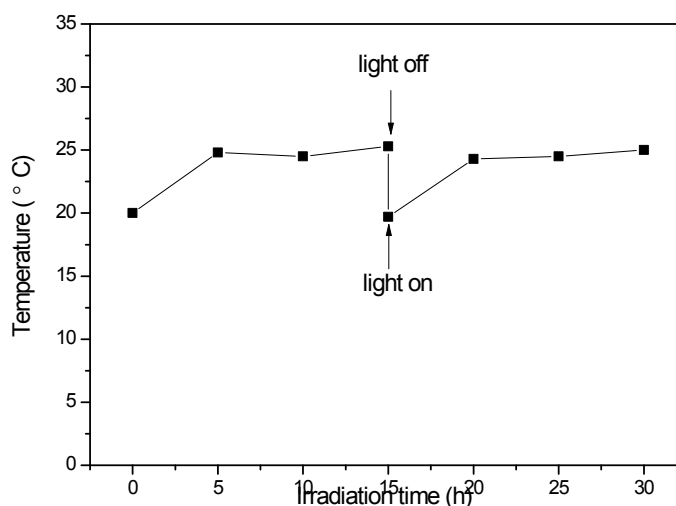

**Fig. S2** Temperature changes of the reaction solutions during irradiation.

The initial temperature of the solution was about 20 °C. Light was turned on around 7:00 am, and

36 turned off at 24:00 pm. The temperature of solutions rose to about 25 °C after 5 h irradiation and  
 37 maintained around 25 °C during 15 h irradiation. Then the solution was placed at room  
 38 temperature until next morning when the light was turn on again around 6:00 am.

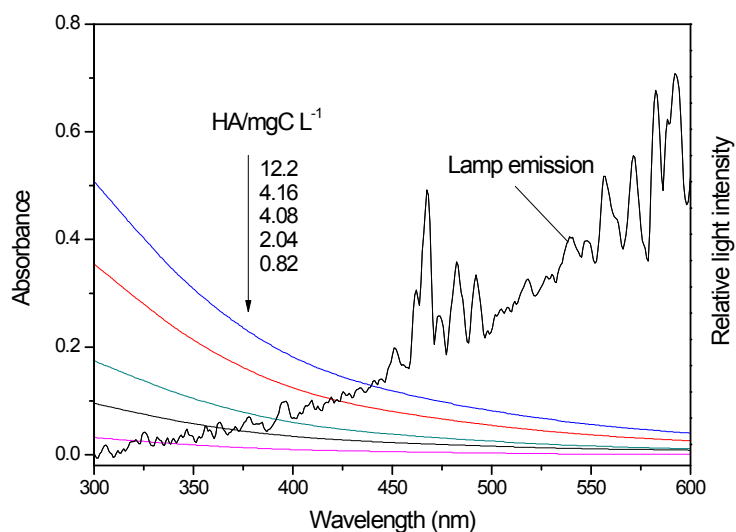

39  
 40 **Fig. S3** HA absorption and Xenon lamp emission spectrum

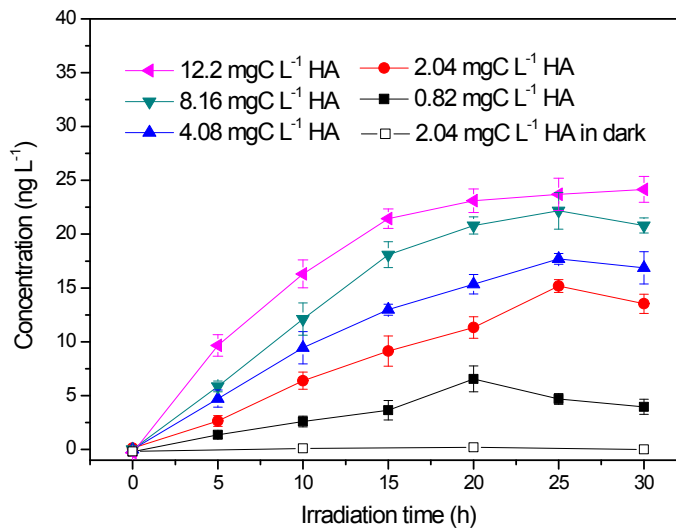

41  
 42 **Fig. S4** Production of methyl bromide (corrected for light screening) in the presence of different  
 43 concentrations of HA and 8 mmol L<sup>-1</sup> Br.

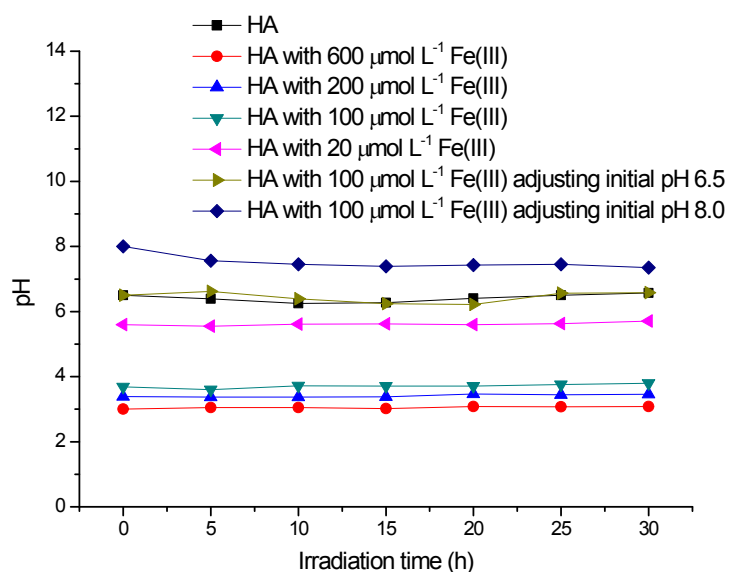

44

45 **Fig. S5** Initial pH of the solutions containing different concentrations of Fe(III) and changes of pH  
 46 during irradiation.

47

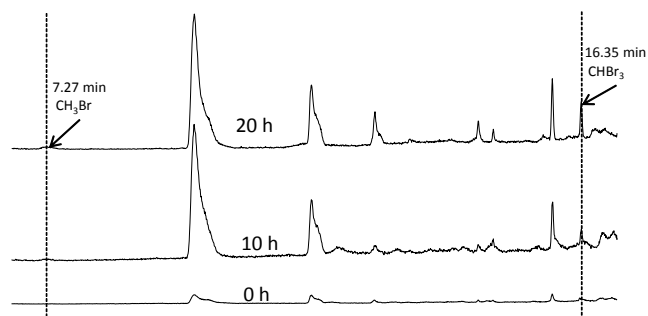

48

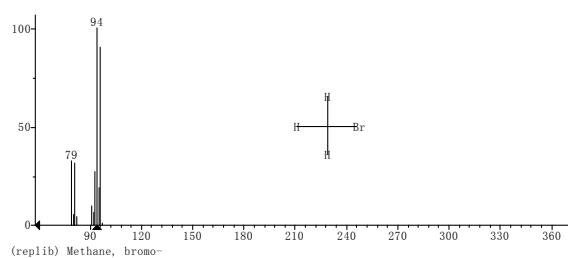

49

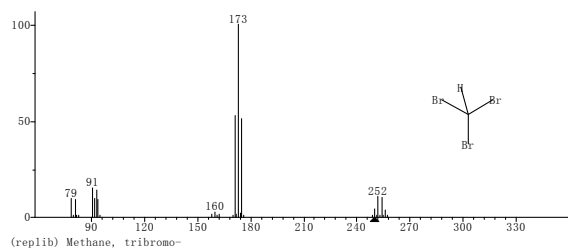

50

51 **Fig. S6** Chromatogram of the gases from the solutions containing 2.04 mgC L<sup>-1</sup> HA, 8 mmol L<sup>-1</sup>  
 52 Br<sup>-</sup> and 100  $\mu\text{mol L}^{-1}$  Fe(III) under irradiation of 0, 10 and 20 h, and the MS spectra of methyl

53 bromide and tribromomethane.

54

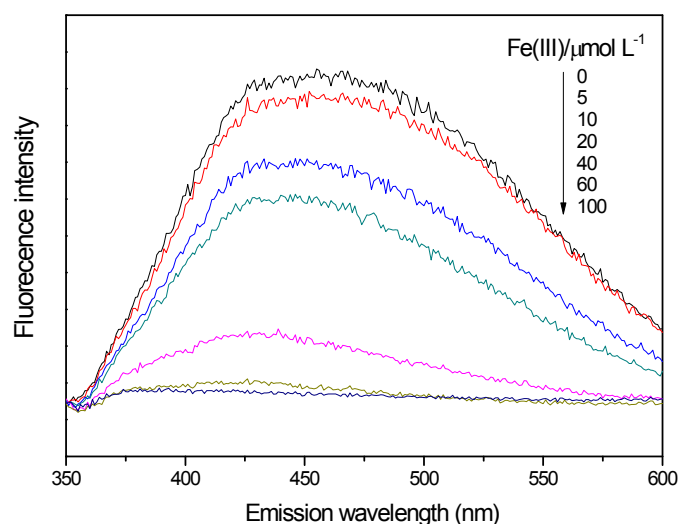

55

56 **Fig. S7** Fluorescence emission spectra of HA in the presence of Fe(III). [HA]=8.16 mgC L<sup>-1</sup>. The  
57 excitation wavelength was 320 nm, and the emission wavelength ranged from 350 nm to 600 nm.

58

59

**Table S1** pH, TOC and concentrations of ions for the seawater

| Parameters                         | Seawater |
|------------------------------------|----------|
| Cl <sup>-</sup> (mM)               | 459      |
| Br <sup>-</sup> (μM)               | 683      |
| SO <sub>4</sub> <sup>2-</sup> (mM) | 23.8     |
| TOC (mg C/L)                       | 2.6      |
| pH                                 | 8.0      |

60 The pH of seawater was measured by a pH-meter (Mettler Toledo, S40-K). The total organic

61 carbon (TOC) concentration was determined by a TOC analyzer (Jena, Multi-N/C-2100S) after

62 the water samples were acidified with 1 M HCl and purged with nitrogen. Concentration of Cl<sup>-</sup>,

63 Br<sup>-</sup> and SO<sub>4</sub><sup>2-</sup> was measured by a ThermoFisher ion chromatography (DIONEX ICS-5000).

64

65

**Table S2** pH of the solutions containing different concentrations of Fe(III)

66

| Fe(III) concentration (μmol L <sup>-1</sup> ) | pH  |
|-----------------------------------------------|-----|
| 0                                             | 6.5 |
| 20.0                                          | 5.6 |
| 100                                           | 3.7 |
| 200                                           | 3.4 |

67

68 **Reference**

- 69 (1) D. Wan, V. K. Sharma, L. Liu, Y. Zuo, Y. Chen, Mechanistic insight into the effect of metal  
70 ions on photogeneration of reactive species from dissolved organic matter. *Environ. Sci.*  
71 *Technol.*, 2019, **53**, 10, 5778-5786.
